# Supplementary material for: Synthesis of novel calix[4]arenep-benzazole derivatives and investigation of their DNA binding and cleavage activities with molecular docking and experimental studies
Source: Royal Society of Chemistry journal article supplement (doi:10.1039/d0ra07486a), 2020-01-01
Supplement: d0ra07486a1.pdf [file d0ra07486a1.pdf]

## SUPPORTING INFORMATION

### Synthesis of novel calix[4]arene *p*-benzazole derivatives and investigation of their DNA binding and cleavage activities with molecular docking and experimental studies

Seyda Cigdem Ozkan<sup>a,b</sup>, Fatma Aksakal<sup>c</sup>, Aydan Yilmaz<sup>\*b</sup>

---

<sup>a</sup>Department of Chemical and Chemical Processing Technologies, Acigol Vocational School of Technical Sciences, Nevsehir Hacı Bektaş Veli University, Nevsehir, Turkey

<sup>b</sup>Department of Chemistry, Faculty of Science, Selcuk University, 42075, Konya, Turkey

<sup>c</sup>Department of Chemistry, Faculty of Science, Hacettepe University, Ankara, Turkey

†\*E-mail: aydan@selcuk.edu.tr; Tel.: +90 332 2233866; Fax: +90 332 2412499

#### CONTENTS

|                                                                                                |           |
|------------------------------------------------------------------------------------------------|-----------|
| MALDI-TOF MS Spectra of the compounds <b>4</b> and <b>5</b> .....                              | <b>S1</b> |
| MALDI-TOF MS Spectra of the compounds <b>6</b> and <b>7</b> .....                              | <b>S2</b> |
| MALDI-TOF MS Spectra of the compounds <b>10</b> and <b>11</b> .....                            | <b>S3</b> |
| MALDI-TOF MS Spectra of the compound <b>12</b> .....                                           | <b>S4</b> |
| Molecular Docking Results for the compounds <b>4</b> , <b>6</b> , <b>7</b> and <b>11</b> ..... | <b>S5</b> |

Compound 4

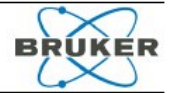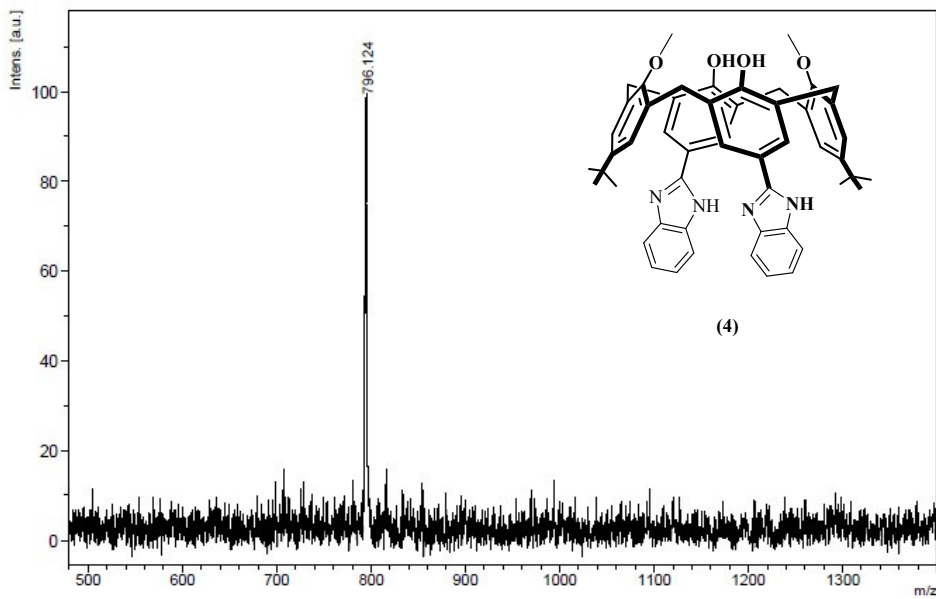

| m/z     | SN | Quality Fac | Res. | Intensity | Area |
|---------|----|-------------|------|-----------|------|
| 796.124 |    |             |      | 23.33     |      |

Compound 5

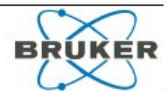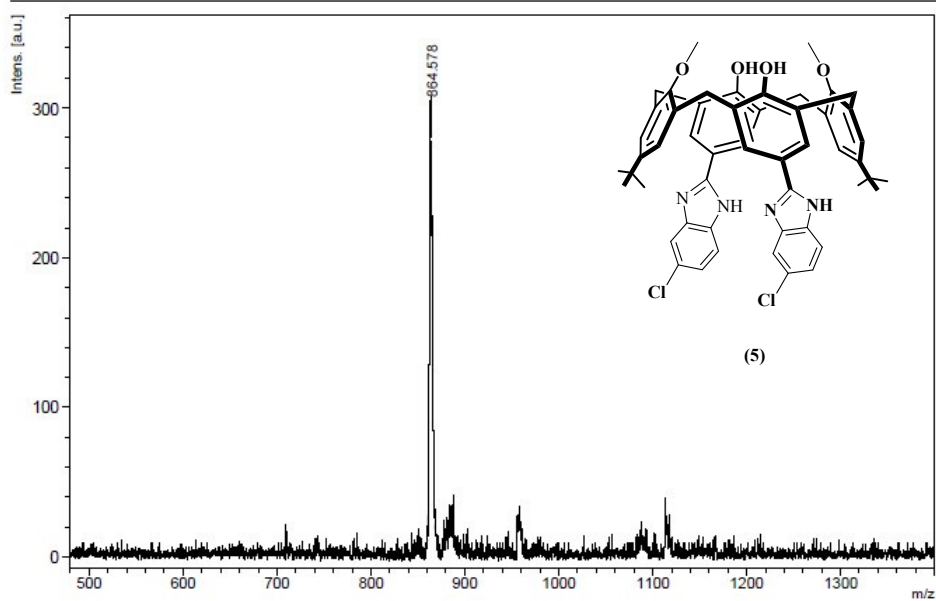

| m/z     | SN | Quality Fac | Res. | Intensity | Area |
|---------|----|-------------|------|-----------|------|
| 864.578 |    |             |      | 278.00    |      |

Figure S1. MALDI-TOF MS spectra of compounds 4 and 5

Compound 6

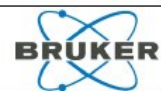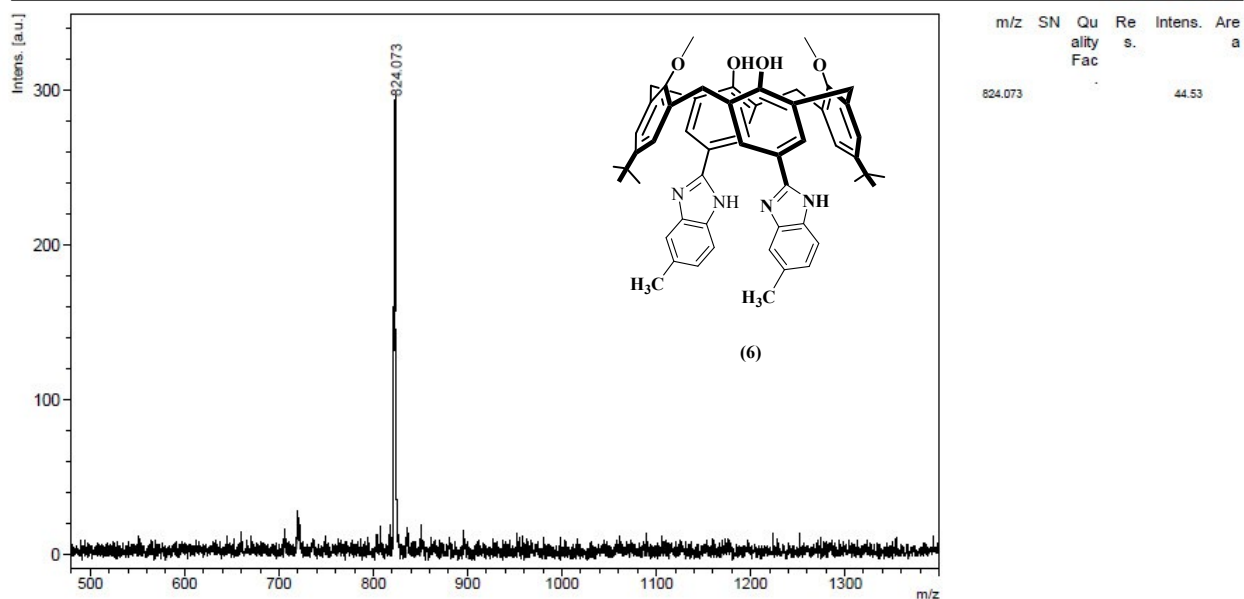

Compound 7

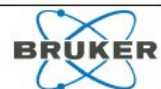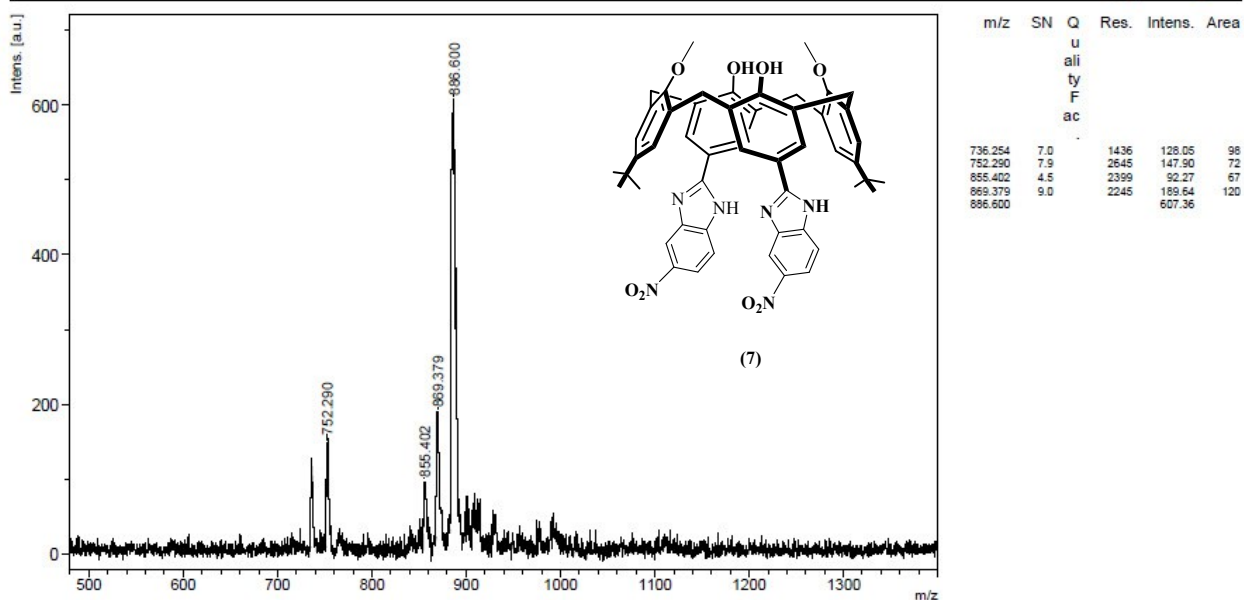

Figure S2. MALDI-TOF MS spectra of compounds 6 and 7

Compound 10

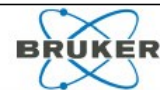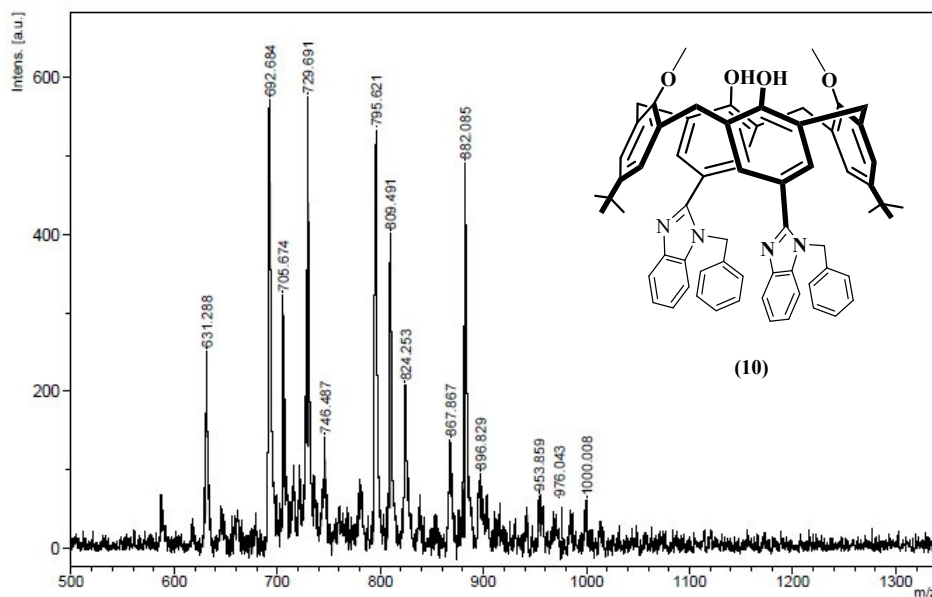

| m/z      | SN   | Q | Res. | Intens. | Area |
|----------|------|---|------|---------|------|
| 631.288  | 8.7  |   | 1432 | 250.95  | 166  |
| 692.684  | 17.0 |   | 778  | 570.31  | 833  |
| 705.674  | 9.3  |   | 673  | 321.66  | 402  |
| 729.691  | 15.8 |   | 660  | 574.24  | 951  |
| 746.487  | 3.7  |   | 2104 | 141.83  | 87   |
| 795.621  | 14.7 |   | 1759 | 532.46  | 395  |
| 809.491  | 11.0 |   | 728  | 400.44  | 511  |
| 824.253  | 5.8  |   | 1259 | 208.20  | 218  |
| 867.867  | 3.9  |   | 1444 | 137.23  | 111  |
| 882.085  | 14.0 |   | 732  | 490.61  | 722  |
| 896.829  | 2.8  |   | 1004 | 94.85   | 99   |
| 942.695  | 1.7  |   | 1786 | 54.15   | 36   |
| 953.859  | 2.2  |   | 2459 | 67.52   | 41   |
| 976.043  |      |   |      | 4.48    |      |
| 984.511  |      |   |      | 49.66   |      |
| 1000.008 |      |   |      | 61.32   |      |

Compound 11

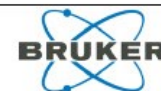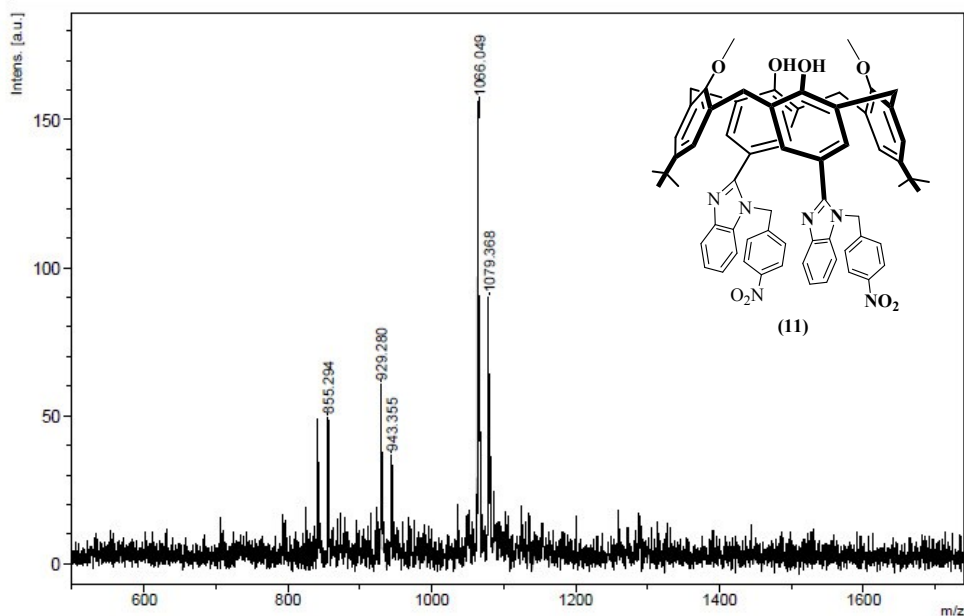

| m/z      | SN  | Q | Res. | Intens. | Area |
|----------|-----|---|------|---------|------|
| 841.399  | 6.2 |   | 1833 | 48.61   | 27   |
| 855.294  | 6.2 |   | 2351 | 49.08   | 22   |
| 929.280  | 7.1 |   | 2336 | 60.35   | 46   |
| 943.355  | 4.2 |   | 2407 | 36.07   | 21   |
| 1066.049 |     |   |      | 50.67   |      |
| 1079.368 |     |   |      | 59.07   |      |

Figure S3. MALDI-TOF MS spectra of compounds 10 and 11

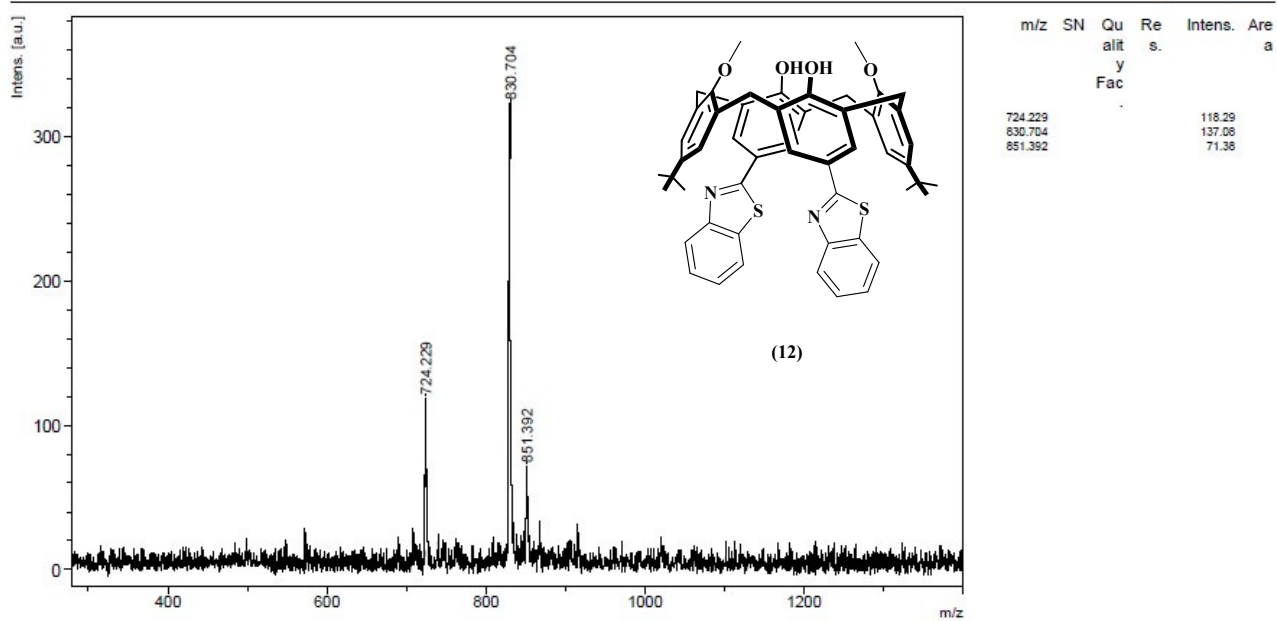

Figure S4. MALDI-TOF MS spectra of compound 12

Compound

(a)

(b)

4

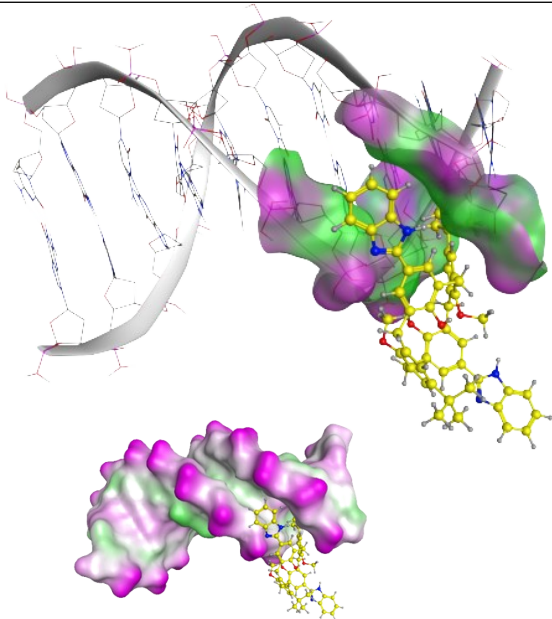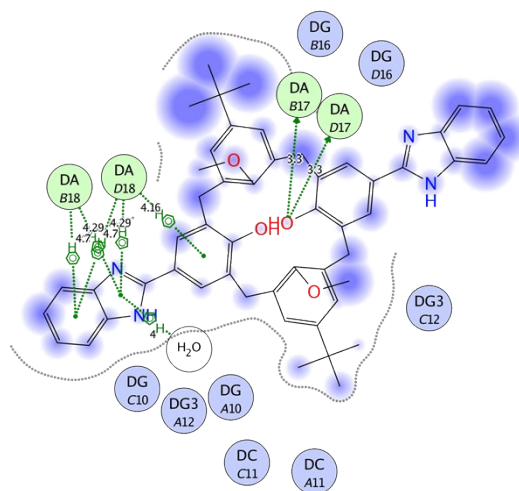

- polar
- acidic
- basic
- greasy
- proximity contour
- sidechain acceptor
- sidechain donor
- backbone acceptor
- backbone donor
- solvent residue
- metal complex
- solvent contact
- metal/ion contact
- ligand exposure
- receptor exposure
- arene-arene
- arene-H
- arene-cation

6

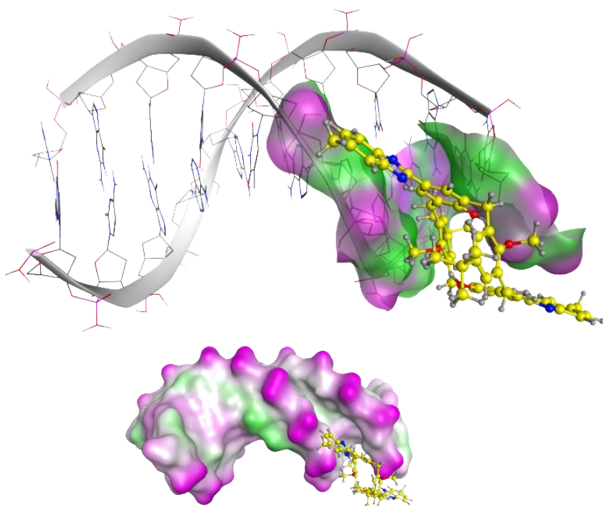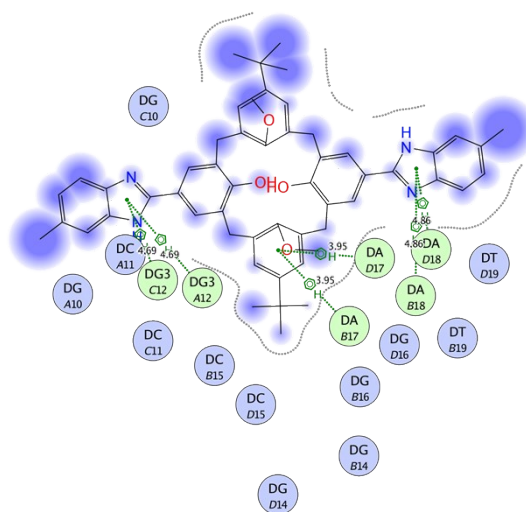

7

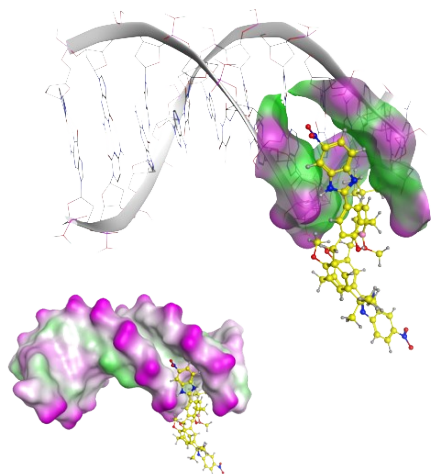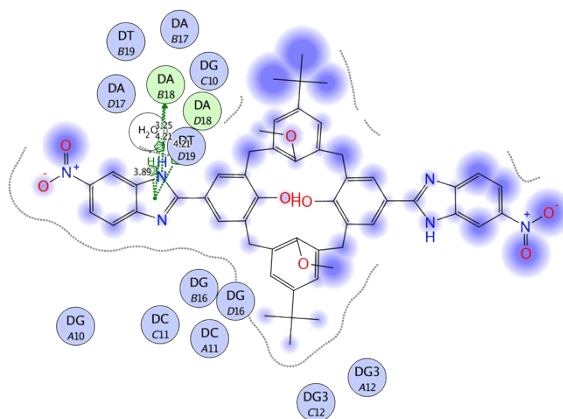

11

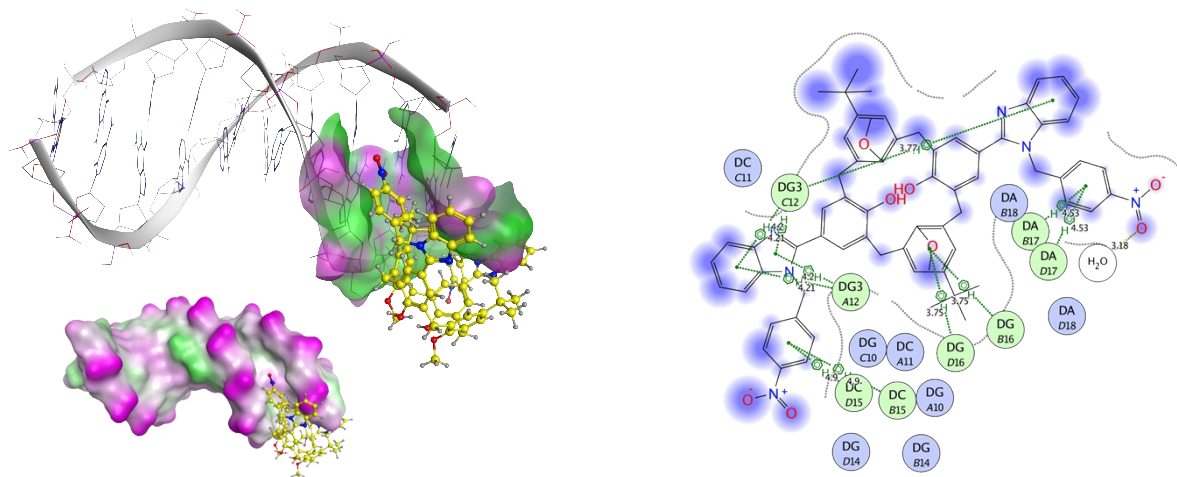

**Figure S5.** Three-dimensional (3D) docked structures with molecular surface representations (a) and two-dimensional (2D) interaction plots (b) obtained for the most energetically profitable poses of compound-DNA complexes (PDB ID: 1BNA).
